# Supplementary material for: Self‐evaluation of duration of adjuvant chemotherapy side effects in breast cancer patients: A prospective study
Source: PubMed Central journal article supplement (PMC6144000; doi:10.1002/cam4.1687), 2018-07-20
Supplement: CAM4-7-4339-s001.pdf [file CAM4-7-4339-s001.pdf]

## 1 Nausea

|                                                                                   |                                                                                                                                                                                                        |                                             |
|-----------------------------------------------------------------------------------|--------------------------------------------------------------------------------------------------------------------------------------------------------------------------------------------------------|---------------------------------------------|
| 1) Have you felt nauseated?                                                       | No <input type="checkbox"/>                                                                                                                                                                            | If no, go to item 2                         |
|                                                                                   | Yes <input type="checkbox"/>                                                                                                                                                                           | If yes, chose one of the definitions below* |
| G1                                                                                | <input type="checkbox"/> I felt nauseated, but I was able to eat and drink as usual                                                                                                                    |                                             |
| G2                                                                                | <input type="checkbox"/> I felt nauseated and, because of that, I ate and drank less than usual                                                                                                        |                                             |
|                                                                                   | <input type="checkbox"/> Because of nausea, I was given intravenous fluids, but for less than one day                                                                                                  |                                             |
| G3                                                                                | <input type="checkbox"/> Because of nausea I was not able to eat and drink for several days: for this reason, I was given prolonged (more than one day) intravenous fluids and/or artificial nutrition |                                             |
| Day nausea started (consider as day 1 the day when chemotherapy was administered) | _____                                                                                                                                                                                                  | Duration in days _____ or persistent; Yes   |
|                                                                                   | No                                                                                                                                                                                                     |                                             |

\*Please, choose which of the definitions below best represents the worst experience related to nausea occurring at any time during the interval between the previous cycle of chemotherapy and today.

## 2) Vomiting

|                                                                                                     |                                                                                                                     |                                             |
|-----------------------------------------------------------------------------------------------------|---------------------------------------------------------------------------------------------------------------------|---------------------------------------------|
| 1) Have you vomited?                                                                                | No <input type="checkbox"/>                                                                                         | If no, go to item 3                         |
|                                                                                                     | Yes <input type="checkbox"/>                                                                                        | If yes, chose one of the definitions below* |
| G1                                                                                                  | <input type="checkbox"/> I vomited 1 or 2 times in one day                                                          |                                             |
| G2                                                                                                  | <input type="checkbox"/> I vomited 3 to 5 times in one day                                                          |                                             |
| G3                                                                                                  | <input type="checkbox"/> I vomited 6 or more times in one day                                                       |                                             |
|                                                                                                     | <input type="checkbox"/> Because of vomiting, I was given intravenous fluids and/or artificial nutrition            |                                             |
| G4                                                                                                  | <input type="checkbox"/> Because of vomiting, I needed urgent hospitalization and I felt that my life was in danger |                                             |
| Day of the first episode of vomiting (consider as day 1 the day when chemotherapy was administered) | _____                                                                                                               | Duration in days _____ or persistent; Yes   |
|                                                                                                     | No                                                                                                                  |                                             |

\*Please, choose which of the definitions below best represents the worst experience related to vomiting occurring at any time during the interval between the previous cycle of chemotherapy and today.
